# Supplementary material for: Oleic Acid Is not the Only Relevant Mono-Unsaturated Fatty Ester in Olive Oil
Source: PubMed Central journal article supplement (PMC7230673; doi:10.3390/foods9040384), 2020-03-26

Article Supplementary Material

# Oleic Acid is not the Only Relevant Mono-Unsaturated Fatty Ester in Olive Oil

Archimede Rotondo <sup>1,\*</sup>, Giovanna Loredana La Torre <sup>1</sup>, Giacomo Dugo <sup>1</sup>, Nicola Cicero <sup>1</sup>, Antonello Santini <sup>2</sup> and Andrea Salvo <sup>3</sup>

<sup>1</sup> Department of Biomedical and Dental Sciences and Morpho-functional Imaging, University of Messina, Polo Universitario Annunziata, Viale Annunziata 98168 Messina, Italy; llatorre@unime.it (G.L.L.T.); dugog@unime.it (G.D.); ncicero@unime.it (N.C.)

<sup>2</sup> Department of Pharmacy, University of Napoli Federico II, via D. Montesano 49, 80131 Napoli, Italy; asantini@unina.it

<sup>3</sup> Department of Chemistry and Drug Technology, University of Roma La Sapienza, via P.le A. Moro 5, 00185 Roma, Italy; andrea.salvo@uniroma1.it

\* Correspondence: arotondo@unime.it; Tel.: 39-090-676-6890

Received: 26 February 2020; Accepted: 19 March 2020; Published: date

**Abstract:** (1) Background: Extra-virgin olive oil (EVOO) is a precious and universally studied food matrix. The quantitative chemical composition was interpreted by an innovative processing method for the nuclear magnetic resonance (NMR) experiments called MARA-NMR. Nonetheless, any EVOO <sup>13</sup>C-NMR (<sup>13</sup>C-NMR) profile displayed inconsistent signals. (2) Methods: This inconsistency was resolved by NMR data comparison to the official gas-chromatographic (GC-FID) experiments: these analyses concerned many EVOOs but also the “exotic” Capparid Spinosa Oil (CSO). (3) Results: NMR and GC-FID consistently evidenced the overwhelming presence of cis-vaccenic esters in the CSO and, more importantly, cis-vaccenic <sup>13</sup>C-NMR resonances unequivocally matched the misunderstood <sup>13</sup>C-NMR signals of EVOOs. The updated assignment revealed the unexpected relevant presence of cis-vaccenic ester (around 3%) in EVOOs; it was neglected, so far, because routine and official GC-FID profiles did not resolve oleic and cis-vaccenic signals leading to the total quantification of both mono unsaturated fatty esters. (4) Conclusions: The rebuilt MARA-NMR and GC-FID interpretations consistently show a meaningful presence of cis-vaccenic in EVOOs, whose content is a potential discrimination factor featuring specific cultivar or geographical origin. The study paves the way toward new quantification panels and scientific research concerning vegetable oils.

**Keywords:** cis-vaccenic; mono-unsaturated fatty; glycerols; NMR analysis; olive oil; Capparid Spinosa; <sup>13</sup>C-NMR; MARA-NMR.

## 1. Introduction

Supplementary file reports extended tables available and extracted through MARA-NMR procedure; just some of the quantitative entries with good deviation and significance are used in the main text, whereas here we also present other data which potentially would boost the application of NMR for the EVOO analysis. The main future target is the quantification of the occurrence of fatty esters in specific glyceridic position (these could be present in the external 1,3- or internal 2-position) but also the determination of sterols, polyphenols and so on.

## 2. Results

## 2.1. Figures

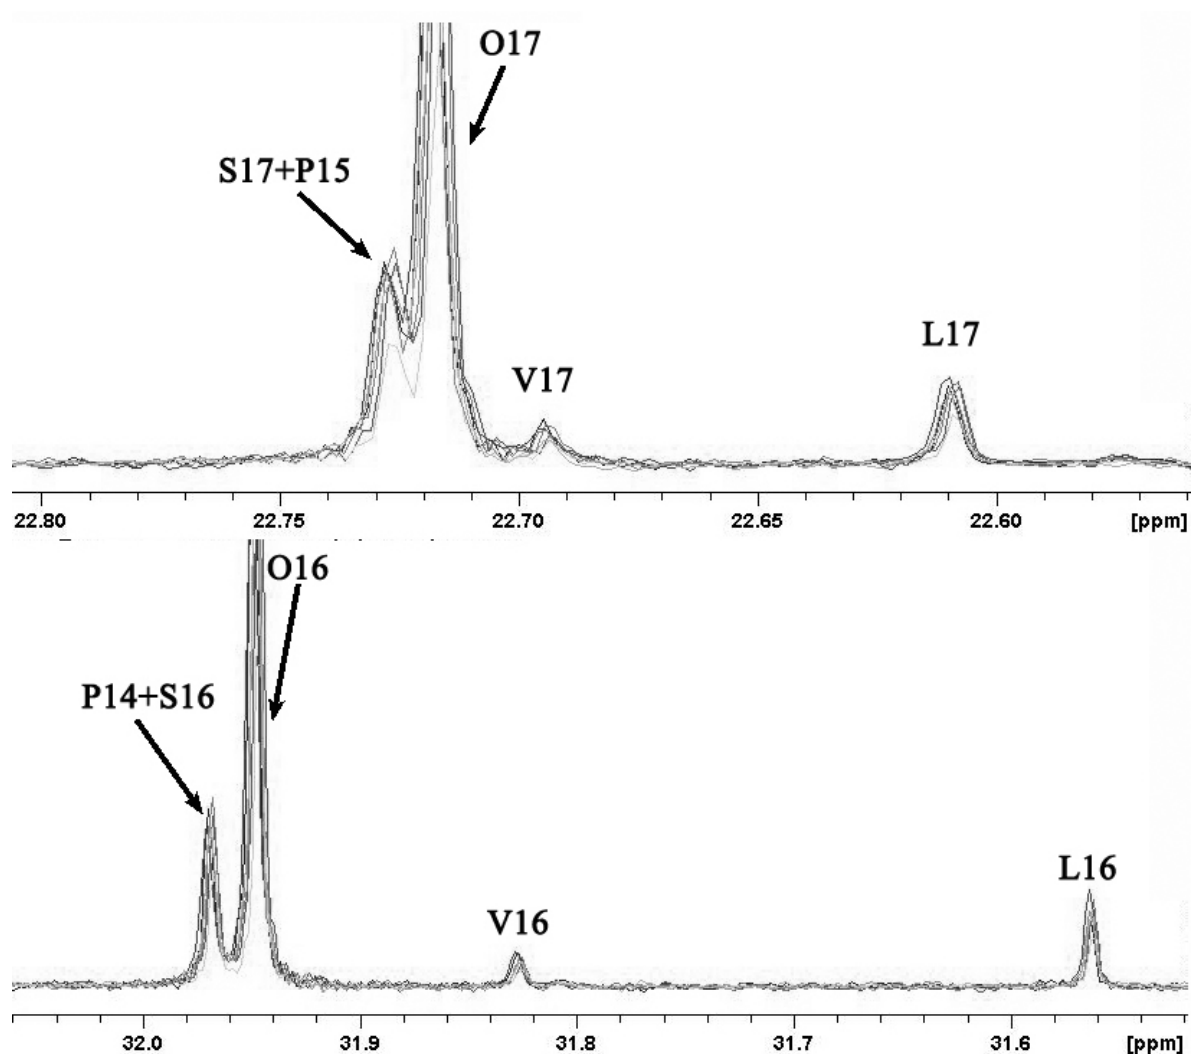

**Figure S1.** Stack-plot of eight olive oils coming from Sicily. The reported assignment follows the labeling used in the main manuscript (scheme 1). The expanded regions around 22 and 32ppm show the clear presence of cis-vaccenic acid signals useful for the quantification within MARA-NMR quantification. The aromatic region is already reported in figure 2 of the main text.

## 2.2. Tables

Tables are extended explanation of the sample type and provenance with also detailed quantitative results from MARA-NMR scheme.

**Table S1.** Analysed samples coming from awarded BIOOIL competition 2014. The used code is connected to the provenance and to the known cultivar.

| Used Code | Lab. Code | Provenience | EVOO Specific Information |
|-----------|-----------|-------------|---------------------------|
| S_1       | TUR_5     | Turkey      | Adremittion monovarietal  |
| S_2       | TUR_6     | Turkey      | Domat monovarietal        |
| S_3       | TUN_7     | Tunisia     | blend                     |
| S_4       | TUN_8     | Tunisia     | Chehiall                  |
| S_5       | SPA_17    | Spain       | Hojiablanca monovarietal  |

|      |         |                  |                                               |
|------|---------|------------------|-----------------------------------------------|
| S_6  | SPA_18  | Spain            | Hojiablanca monovarietal                      |
| S_7  | SPA_20  | Spain            | Hojiablanca monovarietal                      |
| S_8  | SPA_22  | Spain            | Picual monovarietal                           |
| S_9  | SPA_23  | Spain            | Arbequina                                     |
| S_10 | PGL_27  | Portugal         | Calega Vulgar monovarietal                    |
| S_11 | PGL_28  | Portugal         | Cobrancosa Frantoio                           |
| S_12 | PGL_29  | Portugal         | Verderal Madural blend                        |
| S_13 | PGL_30  | Portugal         | blend                                         |
| S_14 | PGL_31  | Portugal         | blend                                         |
| S_15 | CAL_40  | Calabria (Italy) | Cassanese, Corolea blend                      |
| S_16 | CAL_41  | Calabria (Italy) | Nocellara del Belice monovarietal             |
| S_17 | SIC_90  | Sicily (Italy)   | Moresca, Nocellara del Belice, Frantoio blend |
| S_18 | SIC_92  | Sicily (Italy)   | Blend                                         |
| S_19 | SIC_93  | Sicily (Italy)   | Tonda Iblea monovarietal                      |
| S_20 | SIC_94  | Sicily (Italy)   | Blend                                         |
| S_21 | SIC_95  | Sicily (Italy)   | Tonda Iblea monovarietal                      |
| S_22 | SIC_96  | Sicily (Italy)   | Tonda Iblea monovarietal                      |
| S_23 | SIC_97  | Sicily (Italy)   | Tonda Iblea monovarietal                      |
| S_24 | SIC_98  | Sicily (Italy)   | Tonda Iblea monovarietal                      |
| S_25 | SIC_99  | Sicily (Italy)   | Tonda Iblea monovarietal                      |
| S_26 | GRE_113 | Greece           | Koroneiki monovarietal                        |
| S_27 | GRE_116 | Greece           | Blend                                         |
| S_28 | GRE_118 | Greece           | Kolovi monovarietal                           |
| S_29 | GRE_120 | Greece           | n.p.                                          |
| S_30 | GRE_124 | Greece           | Koroneiki monovarietal                        |
| S_31 | SIC_128 | Sicily (Italy)   | Blend: Minuta, Nocellara                      |
| S_32 | SIC_129 | Sicily (Italy)   | Blend from Valdemone                          |
| S_33 | SIC_130 | Sicily (Italy)   | Blend from Messina province                   |

**Table S2.** Quantitative data and relative deviation for 20 main variables, as measured through MARA-NMR processing method working on mono dimensional <sup>1</sup>H and <sup>13</sup>C-NMR experiments for 33 samples.

| Samples | TG%  | 1,2-DG% | 1,3-DG% | SQmol% | Ln% | L%   | O%    | PO% | V%  | P%    | S%  | LnI% | Li% | Oi%  | POi% | Vi%  | Pi%  | Si%  | VSTR | CYSR |
|---------|------|---------|---------|--------|-----|------|-------|-----|-----|-------|-----|------|-----|------|------|------|------|------|------|------|
| S_1     | 96.7 | 1.2     | 2.1     | 1.7    | 0.6 | 10.2 | 63.9  | 1.3 | 2.8 | 19.1  | 2.2 | n.d. | 5.0 | 26.9 | n.d. | 1.4  | n.d. | n.d. | 4501 | 476  |
| S_2     | 97.4 | 1.3     | 1.3     | 2.2    | 0.6 | 12.5 | 61.8  | 0.9 | 2.5 | 19.7  | 1.9 | n.d. | 7.6 | 24.7 | 0.7  | 0.1  | 0.1  | 0.1  | 2578 | 314  |
| S_3     | 97.7 | 1.6     | 0.7     | 1.3    | 0.5 | 12.6 | 59.4  | 0.8 | 3.7 | 21.1  | 2.0 | n.d. | 8.5 | 21.6 | n.d. | n.d. | 1.3  | 2.0  | 3518 | 298  |
| S_4     | 97.4 | 1.4     | 1.2     | 0.8    | 0.6 | 15.4 | 51.9  | 1.1 | 4.9 | 23.7  | 2.4 | n.d. | 8.9 | 21.1 | n.d. | n.d. | 0.9  | 2.4  | 4987 | 597  |
| S_5     | 97.2 | 2.1     | 0.7     | 2.9    | 0.7 | 5.7  | 72.8  | 0.7 | 1.8 | 16.0  | 2.4 | n.d. | 2.9 | 29.4 | 0.7  | 0.3  | n.d. | n.d. | 2310 | 0    |
| S_6     | 97.3 | 1.7     | 1.0     | 2.7    | 0.6 | 2.6  | 73.9  | 0.7 | 3.5 | 16.7  | 1.9 | n.d. | 0.6 | 31.9 | 0.7  | n.d. | n.d. | 0.1  | 1122 | 0    |
| S_7     | 97.3 | 2.0     | 0.8     | 2.5    | 0.6 | 3.1  | 74.2  | 0.8 | 2.7 | 16.1  | 2.5 | n.d. | 2.0 | 29.9 | 0.8  | n.d. | n.d. | 0.7  | 1863 | 0    |
| S_8     | 97.7 | 1.6     | 0.7     | 2.2    | 0.6 | 6.4  | 70.8  | 0.9 | 3.6 | 15.5  | 2.1 | n.d. | 3.3 | 29.0 | n.d. | n.d. | n.d. | 1.0  | 3477 | 533  |
| S_9     | 96.8 | 1.8     | 1.4     | 1.3    | 0.4 | 10.2 | 6n.d. | 1.1 | 5.0 | 21.7  | 1.6 | 0.4  | 6.0 | 23.7 | n.d. | 0.9  | 2.3  | n.d. | 2300 | 0    |
| S_10    | 96.9 | 1.3     | 1.8     | 2.3    | 0.7 | 7.6  | 65.2  | 1.1 | 3.4 | 2n.d. | 2.1 | n.d. | 5.5 | 26.2 | n.d. | 0.8  | 0.9  | n.d. | 2742 | 544  |
| S_11    | 97.4 | 1.2     | 1.4     | 2.9    | 0.6 | 5.9  | 67.2  | 1.2 | 3.6 | 19.2  | 2.4 | 0.6  | 4.1 | 26.9 | n.d. | n.d. | n.d. | 1.7  | 4009 | 1083 |
| S_12    | 97.6 | 1.3     | 1.0     | 3.1    | 0.6 | 7.7  | 65.4  | 2.5 | 4.6 | 17.4  | 1.9 | n.d. | 5.8 | 27.5 | n.d. | n.d. | n.d. | n.d. | 4153 | 1041 |
| S_13    | 97.7 | 1.5     | 0.9     | 2.8    | 0.8 | 8.3  | 67.1  | 1.0 | 2.4 | 18.3  | 2.0 | n.d. | 3.1 | 29.2 | 1.0  | n.d. | n.d. | n.d. | 1923 | 0    |
| S_14    | 97.8 | 1.4     | 0.8     | 3.4    | 0.6 | 4.5  | 71.3  | 1.2 | 2.5 | 17.7  | 2.3 | n.d. | 4.3 | 27.9 | 1.2  | n.d. | n.d. | n.d. | 2311 | 31   |
| S_15    | 97.8 | 1.1     | 1.1     | 4.0    | 0.6 | 8.3  | 64.0  | 0.7 | 3.1 | 20.7  | 2.7 | n.d. | 5.3 | 27.3 | 0.7  | n.d. | n.d. | n.d. | 2848 | 533  |
| S_16    | 97.8 | 1.5     | 0.7     | 3.1    | 0.6 | 6.2  | 70.2  | 0.6 | 3.0 | 17.5  | 2.0 | n.d. | 3.0 | 28.7 | n.d. | 0.9  | 0.1  | 0.6  | 1479 | 3    |
| S_17    | 97.4 | 1.6     | 1.0     | 2.1    | 0.6 | 6.4  | 68.5  | 1.0 | 3.3 | 18.1  | 2.0 | 0.5  | 4.1 | 27.2 | 0.6  | 0.2  | n.d. | 0.8  | 2943 | 376  |
| S_18    | 97.6 | 1.1     | 1.3     | 2.2    | 0.5 | 6.7  | 68.8  | 1.1 | 2.4 | 18.5  | 2.0 | n.d. | 2.5 | 29.6 | 0.9  | 0.1  | 0.1  | 0.1  | 3115 | 586  |
| S_19    | 97.6 | 1.4     | 1.0     | 3.5    | 0.8 | 7.5  | 65.4  | 1.0 | 2.9 | 20.3  | 2.1 | 0.1  | 3.7 | 27.1 | 0.5  | n.d. | 0.8  | 1.0  | 3756 | 374  |

|      |      |     |     |     |     |     |      |     |     |       |     |      |     |      |      |      |      |      |      |     |
|------|------|-----|-----|-----|-----|-----|------|-----|-----|-------|-----|------|-----|------|------|------|------|------|------|-----|
| S_20 | 97.2 | 1.6 | 1.2 | 2.0 | 0.6 | 9.3 | 64.8 | 1.1 | 3.7 | 19.0  | 1.5 | n.d. | 6.2 | 24.9 | n.d. | 0.6  | 1.6  | n.d. | 2788 | 242 |
| S_21 | 97.2 | 1.7 | 1.1 | 3.0 | 0.7 | 7.6 | 66.2 | 0.6 | 3.1 | 19.9  | 1.9 | n.d. | 2.9 | 29.8 | 0.6  | n.d. | n.d. | n.d. | 3313 | 220 |
| S_22 | 97.7 | 1.5 | 0.8 | 3.6 | 0.7 | 7.5 | 64.8 | 1.3 | 3.4 | 20.7  | 1.7 | n.d. | 3.8 | 28.2 | n.d. | n.d. | 1.4  | n.d. | 3031 | 238 |
| S_23 | 98.0 | 1.6 | 0.4 | 3.4 | 0.8 | 6.9 | 65.4 | 1.4 | 2.8 | 20.1  | 2.5 | n.d. | 3.8 | 27.3 | n.d. | 0.1  | n.d. | 2.1  | 2830 | 0   |
| S_24 | 97.6 | 1.6 | 0.8 | 3.4 | 0.7 | 7.9 | 65.9 | 1.1 | 2.5 | 2n.d. | 2.0 | 0.7  | 4.5 | 27.4 | n.d. | n.d. | 0.7  | n.d. | 2622 | 51  |
| S_25 | 98.0 | 1.2 | 0.8 | 2.4 | 0.6 | 7.2 | 66.9 | 0.6 | 3.6 | 19.2  | 2.0 | n.d. | 4.0 | 27.7 | n.d. | n.d. | n.d. | 1.5  | 3967 | 761 |
| S_26 | 97.3 | 1.3 | 1.4 | 2.0 | 0.7 | 4.4 | 73.3 | 1.3 | 3.0 | 15.6  | 1.8 | n.d. | 0.6 | 32.7 | n.d. | n.d. | n.d. | n.d. | 1620 | 36  |
| S_27 | 97.4 | 1.5 | 1.1 | 2.5 | 0.6 | 4.4 | 72.2 | 0.9 | 2.6 | 16.9  | 2.3 | 0.6  | 4.3 | 26.6 | n.d. | n.d. | 1.8  | n.d. | 2883 | 542 |
| S_28 | 97.8 | 1.3 | 0.9 | 2.5 | 0.6 | 7.1 | 73.9 | 1.3 | 1.5 | 13.7  | 1.8 | 0.6  | 4.5 | 27.3 | n.d. | n.d. | 0.8  | n.d. | 3444 | 371 |
| S_29 | 96.9 | 1.4 | 1.6 | 2.7 | 0.7 | 5.2 | 70.5 | 1.4 | 2.6 | 17.1  | 2.4 | n.d. | 4.0 | 26.9 | n.d. | 0.6  | n.d. | 1.8  | 3054 | 555 |
| S_30 | 97.9 | 1.2 | 0.9 | 1.9 | 0.6 | 4.8 | 73.1 | 0.9 | 2.9 | 15.4  | 2.3 | 0.6  | 2.1 | 28.8 | 0.9  | n.d. | n.d. | 0.9  | 2899 | 428 |
| S_31 | 96.9 | 2.5 | 0.5 | 2.6 | 0.6 | 6.3 | 64.5 | 0.5 | 5.2 | 21.5  | 1.4 | n.d. | 3.6 | 28.7 | n.d. | n.d. | 1.0  | n.d. | 2695 | 247 |
| S_32 | 96.0 | 3.0 | 1.0 | 3.1 | 0.7 | 9.4 | 61.8 | 1.0 | 4.4 | 21.1  | 1.8 | 0.7  | 4.7 | 26.1 | 0.6  | 0.6  | 0.1  | 0.6  | 2681 | 168 |
| S_33 | 95.8 | 2.3 | 1.9 | 2.2 | 0.7 | 8.7 | 65.6 | 1.0 | 3.9 | 18.3  | 1.9 | 0.7  | 4.9 | 26.9 | n.d. | n.d. | 0.3  | 0.6  | 3136 | 323 |

Symbols of compounds are explained in the Table 1 in the main text. We point out the great potential of the MARA NMR also estimating the internal/external position of the fatty esters.

#### 4. Discussion

#### 5. Conclusions

This study definitely assesses the constant and relevant presence in olive oils of a not-oleic mono-unsaturated fatty ester called cis-vaccenic ester. It resolves the literature controversies concerning the assignment of some  $^{13}\text{C}$ -NMR resonances but, more importantly, it brings back the expected coherency between NMR and chromatography data. The serendipitous comparison of GC-FID and NMR profiles for the “exotic” Capparis Spinosa oil evidenced the overwhelming amount of cis-vaccenic ester in this matrix but also unambiguously confirmed  $^{13}\text{C}$ -NMR assignments also validated in olive oil. By reconsidering the NMR and GC-FID of olive oils, it turned out the surprising quantitative contribution (around 3%) of cis-vaccenic ester. The official GC method does not always perform an acceptable resolution to resolve and quantify oleic and cis-vaccenic esters and this is leading to the undistinguished quantification of both mono-unsaturated fatty esters. It opens up a great potential for any technique able to clearly resolve cis-vaccenic moieties (just like  $^{13}\text{C}$ -NMR) in the study of extra-virgin olive oils.

#### 6. Patents

This section is not mandatory, but may be added if there are patents resulting from the work reported in this manuscript.

#### Appendix A

##### MARA-NMR

**Table S3.** General scheme of MARA-NMR referred just to the first sample. There are several blocks: namely  $^1\text{H}$ -NMR integrations with assignment (100 entries), DPGSE  $^1\text{H}$ -NMR integrations (17 entries, **not used in this study**),  $^{13}\text{C}$ -NMR integrations (90 entries) along with some sum of integrals belonging to the same spectral block. Where possible, assignments are performed respecting the chemical position indicated also in other studies about the NMR of olive oil compounds (see Figure 1), for the fatty esters the abbreviation is followed by a number indicating the distance from the carboxyl position (generally from 1 to 18). These first rows will be used in the following equations according to the style of (1) (see main text) conveyed as square sum in the row called RHO. The RHO value is minimized playing around with the quantitative variables so that the theoretical outcome is best-fitting the real (independent) variables.

| Groups | Assignments                       | Integrat<br>Ion<br>Label | Integral<br>Range |       |       |
|--------|-----------------------------------|--------------------------|-------------------|-------|-------|
|        | Chemical label                    |                          |                   |       | S_1   |
|        | Saturated linear aldehydes        | I_1                      | 9.77              | 9.746 | 0.064 |
|        | 5S,4R(TY-EA-DA+HTY-EA-DA)         | I_2                      | 9.694             | 9.674 | 0.029 |
|        | Aldehyde A                        | I_3                      | 9.674             | 9.659 | 0.016 |
|        | HTY-EDA-DA<br>(Oleocanthal 3-C-H) | I_4                      | 9.65              | 9.634 | 0.025 |
|        | TY-EDA-DA<br>(Olacein 3-C-H)      | I_5                      | 9.634             | 9.622 | 0.000 |
|        | HTY-EA-CYA                        | I_6                      | 9.534             | 9.519 | 0.025 |

|                                                  |      |       |       |       |
|--------------------------------------------------|------|-------|-------|-------|
| TY-EA-CYA+1/2(2E-hexenal)+1/2(2E-alkenal)        | I_7  | 9.519 | 9.505 | 0.012 |
| 1/2(2E-hexenal)                                  | I_8  | 9.505 | 9.496 | 0.004 |
| 1/2(2E-alkenal)                                  | I_9  | 9.496 | 9.491 | 0.004 |
| 5S,4S(TY-EA-DA+HTY-EA-DA)                        | I_10 | 9.465 | 9.446 | 0.011 |
| Aldehyde B                                       | I_11 | 9.364 | 9.351 | 0.018 |
| Aldehyde C                                       | I_12 | 9.328 | 9.309 | 0.008 |
| Aldehyde D                                       | I_13 | 9.289 | 9.28  | 0.008 |
| ELENOLIDE see magiatis et al 2019                | I_14 | 9.28  | 9.264 | 0.005 |
| TY-EDA-DA (Olacein 1-C-H)                        | I_15 | 9.24  | 9.228 | 0.014 |
| HTY-EDA-DA (Oleocanthal 1-C-H)+TY-EA-DA+TY-EA-EN | I_16 | 9.228 | 9.211 | 0.003 |
| HTY-EA-DA+HTY-EA-EN                              | I_17 | 9.211 | 9.19  | 0.005 |
| Unidentified water exchanging protons            | I_18 | 8.302 | 8.106 | 0.449 |
| unknown singlet                                  | I_19 | 8.106 | 8.09  | 0.019 |
| unidentified hydroxyl groups                     | I_20 | 8.09  | 8.007 | 0.062 |
| formaldehyde                                     | I_21 | 8.007 | 7.996 | 0.027 |
| phtalate A                                       | I_22 | 7.728 | 7.694 | 0.032 |
| Polyphenol A                                     | I_23 | 7.683 | 7.66  | 0.004 |
| ELENOLIDE-3-CH                                   | I_24 | 7.65  | 7.64  | 0.000 |
| unknown                                          | I_25 | 7.594 | 7.58  | 0.008 |
| TY-EA-CYH (3-CH)                                 | I_26 | 7.58  | 7.562 | 0.008 |
| HTY-EA-CYH (3-CH)                                | I_27 | 7.562 | 7.547 | 0.004 |
| phtalate B                                       | I_28 | 7.538 | 7.502 | 0.038 |
| CDCI3 sat A                                      | I_29 | 7.5   | 7.47  | 0.058 |
| half 1 TY-EA-CYA                                 | I_30 | 7.413 | 7.404 | 0.003 |
| half 1 HTY-EA-CYA                                | I_31 | 7.404 | 7.397 | 0.003 |
| half 2 TY-EA-CYA                                 | I_32 | 7.386 | 7.378 | 0.007 |
| half 2 HTY-EA-CYA                                | I_33 | 7.378 | 7.371 | 0.008 |
| unknown cycloene-eter A                          | I_34 | 7.354 | 7.347 | 0.017 |

|                                                                                                                 |      |       |       |         |
|-----------------------------------------------------------------------------------------------------------------|------|-------|-------|---------|
| unknown cycloene -<br>eter B                                                                                    | I_35 | 7.347 | 7.338 | 0.029   |
| CDCI3                                                                                                           | I_36 | 7.302 | 7.226 | 8.519   |
| SatB CDCI3+ TY-<br>Derivates (4-CH, 2H)                                                                         | I_37 | 7.1   | 7     | 0.110   |
| unknown<br>polyphenols B                                                                                        | I_38 | 6.907 | 6.814 | 0.053   |
| TY-derivates (7-CH,<br>2H)+ HTY-derivates<br>(7,8-CH, 2H)                                                       | I_39 | 6.814 | 6.667 | 0.125   |
| HTY-Derivates (4-<br>CH, 1H)+<br>(Z,E)peroxideA+<br>ELENOLIDE-8-CH                                              | I_40 | 6.667 | 6.507 | 0.722   |
| unknown<br>polyphenols                                                                                          | I_41 | 6.488 | 6.438 | 0.115   |
| (E,E)peroxide A                                                                                                 | I_42 | 6.326 | 6.209 | 0.286   |
| (E,E)peroxide B                                                                                                 | I_43 | 6.186 | 6.058 | 0.222   |
| (Z,E)peroxide B                                                                                                 | I_44 | 6.04  | 5.961 | 0.542   |
| unknown                                                                                                         | I_45 | 5.961 | 5.837 | 0.202   |
| (E,E)peroxide C                                                                                                 | I_46 | 5.802 | 5.692 | 0.519   |
| unknown                                                                                                         | I_47 | 5.693 | 5.612 | 0.431   |
| (Z,E)peroxide C                                                                                                 | I_48 | 5.611 | 5.555 | 0.701   |
| (Z,E)peroxide D                                                                                                 | I_49 | 5.556 | 5.532 | 0.458   |
| alkenes+(E,E)peroxid<br>e D                                                                                     | I_50 | 5.532 | 5.44  | 5.650   |
| CH=CH                                                                                                           | I_51 | 5.44  | 5.29  | 857.702 |
| CH-TG                                                                                                           | I_52 | 5.29  | 5.223 | 158.600 |
| (8CH)SQ+1,2-DG                                                                                                  | I_53 | 5.223 | 5.051 | 12.305  |
| terpeneXX                                                                                                       | I_54 | 5.051 | 4.836 | 0.539   |
| terpeneX+residual<br>water                                                                                      | I_55 | 4.759 | 4.723 | 0.162   |
| terpeneC                                                                                                        | I_56 | 4.723 | 4.695 | 0.570   |
| Group C=CH2 of<br>sterols:<br>Gramisterol/Obtusifo<br>liol/Cycloleucalenol/<br>24-<br>Methylenecycloartan<br>ol | I_57 | 4.674 | 4.642 | 0.409   |
| Geranylgeraniol and<br>phytol esters (GERG<br>and PHYT)                                                         | I_58 | 4.605 | 4.564 | 0.487   |
| satB-CH2''-TG                                                                                                   | I_59 | 4.479 | 4.409 | 1.597   |
| CH2''-TG+2(1,2-DG)                                                                                              | I_60 | 4.365 | 4.204 | 327.739 |
| CH2'-TG+5(1,3-DG)                                                                                               | I_61 | 4.204 | 4.049 | 340.910 |



|                                                                                              |      |       |       |          |
|----------------------------------------------------------------------------------------------|------|-------|-------|----------|
| acetate-esters+<br>satellite CH2' overlap                                                    | I_62 | 4.049 | 4.003 | 3.032    |
| satA-CH2'-TG partial                                                                         | I_63 | 4.003 | 3.954 | 1.014    |
|                                                                                              | I_64 | 3.826 | 3.768 | 0.586    |
| 1,2-DG                                                                                       | I_65 | 3.769 | 3.662 | 3.966    |
| unknown                                                                                      | I_66 | 3.662 | 3.561 | 1.404    |
| ( $\oplus$ -sitosterol + $\oplus$ 5-<br>avenasterol + $\oplus$ 5-<br>campesterol) >CH-<br>OH | I_67 | 3.561 | 3.474 | 1.261    |
| unknown singlet                                                                              | I_68 | 3.474 | 3.464 | 0.112    |
|                                                                                              | I_69 | 3.464 | 3.422 | 0.425    |
|                                                                                              | I_70 | 3.422 | 3.359 | 0.618    |
| Cycloartenol+ 24-<br>Methylenecycloartan<br>ol (3->CH-OH)                                    | I_71 | 3.304 | 3.246 | 0.951    |
| Cicloeucaleenol+<br>gramisterol (>CH-<br>OH)                                                 | I_72 | 3.162 | 3.069 | 1.138    |
| maslinic acid+<br>urosolic acid                                                              | I_73 | 3.052 | 3.006 | 0.639    |
| satB-divinylCH2tufa<br>shoulder                                                              | I_74 | 2.968 | 2.92  | 0.918    |
| satB-divinylCH2                                                                              | I_75 | 2.921 | 2.868 | 1.634    |
| divynilCH2-TUFA                                                                              | I_76 | 2.854 | 2.798 | 8.810    |
| divynilCH2-DUFA                                                                              | I_77 | 2.798 | 2.732 | 104.636  |
| foot of the divynil<br>signal                                                                | I_78 | 2.732 | 2.689 | 1.501    |
| satA-divinylCH2+X                                                                            | I_79 | 2.67  | 2.555 | 2.868    |
| satB-a-CH2                                                                                   | I_80 | 2.477 | 2.402 | 8.731    |
| $\oplus$ -CH2                                                                                | I_81 | 2.364 | 2.25  | 1000.000 |
| satb-vinylCH2+satA-<br>a-CH2                                                                 | I_82 | 2.217 | 2.112 | 20.435   |
| vinylCH2-<br>pufa+20(H) vinyl<br>CH2-SQ                                                      | I_83 | 2.109 | 1.937 | 1630.670 |
| satA-vynilCH2                                                                                | I_84 | 1.921 | 1.838 | 17.490   |
| interspace                                                                                   | I_85 | 1.838 | 1.779 | 6.554    |
| residual water                                                                               | I_86 | 1.778 | 1.696 | 14.111   |
| 1-SQ-CH3-6H*(SQ)                                                                             | I_87 | 1.696 | 1.665 | 16.372   |

|                                                                                  |                   |                |       |          |
|----------------------------------------------------------------------------------|-------------------|----------------|-------|----------|
| ⊖-CH <sub>2</sub> +18H*(SQ)                                                      | I_88              | 1.665          | 1.521 | 1033.270 |
| satb-CH <sub>2</sub> -FA                                                         | I_89              | 1.521          | 1.402 | 71.079   |
| CH <sub>2</sub> -FA                                                              | I_90              | 1.402          | 1.193 | 9574.030 |
| sat CH <sub>2</sub> -FA                                                          | I_91              | 1.194          | 1.065 | 91.374   |
| 3/4satB-FA                                                                       | I_92              | 1.041          | 0.995 | 9.523    |
| Me-⊖3-FA+satB/4                                                                  | I_93              | 0.995          | 0.95  | 10.883   |
| Me-FA                                                                            | I_94              | 0.95           | 0.825 | 1337.720 |
| satA-FA                                                                          | I_95              | 0.774          | 0.727 | 7.404    |
| (b-sitosterol + D5-avenasterol + D5-campesterol) 18-CH <sub>3</sub>              | I_96              | 0.694          | 0.671 | 2.250    |
| Gramisterol*3H+Cycloartenol+ 24-Methylenecycloartanol (endo, 19CH <sub>2</sub> ) | I_97              | 0.576          | 0.548 | 0.238    |
| other sterol                                                                     | I_98              | 0.547          | 0.519 | 0.560    |
| Cycloartenol+ 24-Methylenecycloartanol (exo, 19CH <sub>2</sub> )                 | I_99              | 0.354          | 0.314 | 0.514    |
| TMS                                                                              | I_100             | 0.02           | -0.02 | 34.219   |
|                                                                                  |                   |                |       | S_1      |
| Assignments                                                                      | Integration_Label | Integral Range | 0.000 |          |
| Saturated linear aldehydes                                                       | I_D_1             | 9.77           | 9.746 | 49.622   |
| 5S,4R(TY-EA-DA+HTY-EA-DA)                                                        | I_D_2             | 9.694          | 9.674 | 10.109   |
| Aldehyde A                                                                       | I_D_3             | 9.674          | 9.659 | 40.656   |
| HTY-EDA-DA (Oleocanthal 3-C-H)                                                   | I_D_4             | 9.65           | 9.634 | 85.794   |
| TY-EDA-DA (Olacain 3-C-H)                                                        | I_D_5             | 9.634          | 9.622 | 100.000  |
| HTY-EA-CYA                                                                       | I_D_6             | 9.534          | 9.519 | 18.810   |
| TY-EA-CYA+1/2(2E-hexenal)+1/2(2E-alkenal)                                        | I_D_7             | 9.519          | 9.505 | 23.111   |
| 1/2(2E-hexenal)                                                                  | I_D_8             | 9.505          | 9.496 | 8.377    |
| 1/2(2E-alkenal)                                                                  | I_D_9             | 9.496          | 9.491 | 1.749    |
| 5S,4S(TY-EA-DA+HTY-EA-DA)                                                        | I_D_10            | 9.465          | 9.446 | -2.631   |

|                                                                                 |                                                     |                   |                |         |        |
|---------------------------------------------------------------------------------|-----------------------------------------------------|-------------------|----------------|---------|--------|
|                                                                                 | Aldehyde B                                          | I_D_11            | 9.364          | 9.351   | 3.743  |
|                                                                                 | Aldehyde C                                          | I_D_12            | 9.328          | 9.309   | 6.574  |
|                                                                                 | Aldehyde D                                          | I_D_13            | 9.289          | 9.28    | 9.610  |
|                                                                                 | ELENOLIDE                                           | I_D_14            | 9.28           | 9.264   | 8.560  |
|                                                                                 | TY-EDA-DA<br>(Olacain 1-C-H)                        | I_D_15            | 9.24           | 9.228   | 85.664 |
|                                                                                 | HTY-EDA-DA<br>(Oleocanthal 1-C-H)+TY-EA-DA+TY-EA-EN | I_D_16            | 9.228          | 9.211   | 73.169 |
|                                                                                 | HTY-EA-DA+HTY-EA-EN                                 | I_D_17            | 9.211          | 9.19    | 10.275 |
|                                                                                 |                                                     |                   |                |         |        |
|                                                                                 |                                                     |                   |                |         |        |
|                                                                                 |                                                     |                   |                |         |        |
|                                                                                 | Assignments                                         | Integration_Label | Integral Range |         | S_1    |
|                                                                                 | Pext1+Sext1                                         | I_13C_1           | 173.242        | 173.21  | 9.693  |
|                                                                                 | Oext1+Lext1+POext1+Lnext1+Vext1                     | I_13C_2           | 173.21         | 173.172 | 24.661 |
|                                                                                 | Oint1+Lint1+Pint1+Sin1+POint1+Eint1                 | I_13C_3           | 172.808        | 172.768 | 17.673 |
|                                                                                 | SQ10(q)                                             | I_13C_4           | 135.084        | 135.015 | 0.500  |
|                                                                                 | SQ6(q)                                              | I_13C_5           | 134.896        | 134.793 | 1.090  |
|                                                                                 | Ln16                                                | I_13C_6           | 131.959        | 131.892 | 0.842  |
|                                                                                 | SQ2(q)                                              | I_13C_7           | 131.193        | 131.116 | 1.337  |
| CH toward the tail of fatty ester<br>L13+Ln9+O10+PO10+L9+V12=2Ln+2L+O+PO+V      | L13+Ln9                                             | I_13C_8           | 130.224        | 130.157 | 13.622 |
|                                                                                 | Oint10                                              | I_13C_9           | 130.037        | 130.014 | 29.662 |
|                                                                                 | Oext10+POint10                                      | I_13C_10          | 130.014        | 129.989 | 43.055 |
|                                                                                 | Lext9+POext10                                       | I_13C_11          | 129.989        | 129.97  | 8.554  |
|                                                                                 | Lint9                                               | I_13C_12          | 129.97         | 129.944 | 6.261  |
| CH toward the head of fatty ester<br>V11+O9+PO9+Ln12+Ln13+L10+L12=2Ln+2L+PO+O+V | V12                                                 | I_13C_13          | 129.935        | 129.91  | 2.848  |
|                                                                                 | V11                                                 | I_13C_14          | 129.839        | 129.818 | 3.050  |
|                                                                                 | Oext9                                               | I_13C_15          | 129.729        | 129.696 | 40.723 |
|                                                                                 | Oint9+PO9                                           | I_13C_16          | 129.696        | 129.666 | 28.969 |
|                                                                                 | Ln12                                                | I_13C_17          | 128.323        | 128.283 | 0.644  |
|                                                                                 | Ln13                                                | I_13C_18          | 128.265        | 128.217 | 0.769  |

|                                                                 |                                                    |              |         |         |         |
|-----------------------------------------------------------------|----------------------------------------------------|--------------|---------|---------|---------|
|                                                                 | L10                                                | I_13C_1<br>9 | 128.129 | 128.075 | 12.563  |
|                                                                 | L12                                                | I_13C_2<br>0 | 127.956 | 127.898 | 10.504  |
|                                                                 | Ln10                                               | I_13C_2<br>1 | 127.815 | 127.761 | 0.771   |
|                                                                 | Ln15                                               | I_13C_2<br>2 | 127.17  | 127.116 | 0.147   |
|                                                                 | SQ3                                                | I_13C_2<br>3 | 124.472 | 124.441 | 1.084   |
|                                                                 | SQ11                                               | I_13C_2<br>4 | 124.369 | 124.332 | 0.805   |
|                                                                 | SQ7                                                | I_13C_2<br>5 | 124.332 | 124.301 | 1.097   |
|                                                                 | CHOH                                               | I_13C_2<br>6 | 68.974  | 68.894  | 32.623  |
|                                                                 | CH2OH                                              | I_13C_2<br>7 | 62.188  | 62.034  | 68.405  |
|                                                                 | SQ9                                                | I_13C_2<br>8 | 39.795  | 39.775  | 1.211   |
|                                                                 | SQ5                                                | I_13C_2<br>9 | 39.775  | 39.753  | 0.927   |
| (P+S+O+E+PO+L+Ln)2                                              | (Pint+Sint+Oint+Vint+POint+Lint+Lnint)2            | I_13C_3<br>0 | 34.233  | 34.185  | 33.333  |
|                                                                 | Pext2+Sext2+Vext2                                  | I_13C_3<br>1 | 34.082  | 34.053  | 21.121  |
|                                                                 | Oext2+Lext2+Lnext2                                 | I_13C_3<br>2 | 34.053  | 34.025  | 46.016  |
| E18+(S+O+E+L)16+(PO+P)14+(UNK)=E+PO+P+S+O+E+L                   | P14+S16                                            | I_13C_3<br>3 | 31.982  | 31.959  | 21.649  |
|                                                                 | O16                                                | I_13C_3<br>4 | 31.959  | 31.928  | 67.470  |
|                                                                 | V16                                                | I_13C_3<br>5 | 31.839  | 31.817  | 3.034   |
|                                                                 | PO14                                               | I_13C_3<br>6 | 31.817  | 31.8    | 1.395   |
|                                                                 | L16                                                | I_13C_3<br>7 | 31.574  | 31.55   | 11.106  |
| PO13+O12+V14+S14+S13+S12+S11+O7+S10+P12+P11+P10+PO12=2O+V+5S+3P | PO13                                               | I_13C_3<br>8 | 29.947  | 29.919  | 0.758   |
|                                                                 | O12                                                | I_13C_3<br>9 | 29.827  | 29.784  | 78.794  |
|                                                                 | V14+V13                                            | I_13C_4<br>0 | 29.784  | 29.762  | 9.320   |
|                                                                 | S14+S13+S12+S11+O7+S10+P12+P11+P10+PO12=5S+3P+O+PO | I_13C_4<br>1 | 29.762  | 29.712  | 151.653 |
| P7+L7+Ln7+P8+P9+S7+S5+P5+V7+V                                   | Pint7+PO7+P8+P9+S7+S8+S9                           | I_13C_4<br>2 | 29.712  | 29.686  | 44.125  |

|                                                                                                |                                                                                                           |              |              |        |         |        |
|------------------------------------------------------------------------------------------------|-----------------------------------------------------------------------------------------------------------|--------------|--------------|--------|---------|--------|
| 15+O14+S8+S9=4P<br>+4S+L+O+2V                                                                  | Pext7+Lint7                                                                                               | I_13C_4<br>3 | 29.677       | 29.649 | 29.668  |        |
|                                                                                                | Lext7+V7ext                                                                                               | I_13C_4<br>4 | 29.649       | 29.634 | 9.178   |        |
|                                                                                                | not assigned                                                                                              | I_13C_4<br>5 | 29.634       | 29.618 | 4.189   |        |
|                                                                                                | O14+Sint5                                                                                                 | I_13C_4<br>6 | 29.591       | 29.547 | 75.118  |        |
|                                                                                                | Sext5+Pint5                                                                                               | I_13C_4<br>7 | 29.547       | 29.53  | 4.409   |        |
|                                                                                                | Pext5                                                                                                     | I_13C_4<br>8 | 29.53        | 29.5   | 21.200  |        |
|                                                                                                | Ve7                                                                                                       | I_13C_4<br>9 | 29.5         | 29.486 | 3.326   |        |
|                                                                                                | Vi7                                                                                                       | I_13C_5<br>0 | 29.486       | 29.463 | 3.793   |        |
|                                                                                                | S15+P13+L15+O15<br>+O13+Si6+Vi5+P6<br>+Se6+Ve5 =<br>2S+2P+2O+V+L                                          | S15          | I_13C_5<br>1 | 29.436 | 29.416  | 3.857  |
|                                                                                                |                                                                                                           | P13          | I_13C_5<br>2 | 29.416 | 29.393  | 22.638 |
| L15                                                                                            |                                                                                                           | I_13C_5<br>3 | 29.393       | 29.379 | 15.313  |        |
| O13+O15+V15+Sint6                                                                              |                                                                                                           | I_13C_5<br>4 | 29.379       | 29.339 | 149.649 |        |
| P6+V5+Sext6                                                                                    |                                                                                                           | I_13C_5<br>5 | 29.335       | 29.279 | 30.687  |        |
| O5+O6+O4+V6+L<br>5+L4+L6+Ln4+Ln5<br>+Ln6+P4+S4+V4+<br>PO6+PO5+PO4=<br>3O+3L+3Ln+2V+3<br>PO+P+S |                                                                                                           | Oint5        | I_13C_5<br>6 | 29.249 | 29.219  | 38.575 |
|                                                                                                | Oext5+Lint5+Lnint5+<br>Lext5+Lext5+POint5=<br>Oext+L+Ln+Point                                             | I_13C_5<br>7 | 29.22        | 29.182 | 53.523  |        |
|                                                                                                | (Oext6+Vext6+Lint6+<br>Lnint6)+(Pext4+Sext4<br>+POext5+Oint6+Vint<br>6)=<br>O+(L+Ln+E)int+(S+P+<br>PO)ext | I_13C_5<br>8 | 29.182       | 29.13  | 115.641 |        |
|                                                                                                | Oext4+Pint4+Sint4+L<br>ext6+Lnext6+POint6                                                                 | I_13C_5<br>9 | 29.13        | 29.098 | 52.729  |        |
|                                                                                                | Oint4+Lext4+Lnext4+<br>P4+ Oext6+POext4                                                                   | I_13C_6<br>0 | 29.098       | 29.06  | 36.298  |        |
|                                                                                                | POint4+Lint4+Lnint4<br>+V4                                                                                | I_13C_6<br>1 | 29.04        | 29.005 | 5.447   |        |
|                                                                                                | SQ12                                                                                                      | I_13C_6<br>2 | 28.313       | 28.292 | 1.198   |        |
|                                                                                                | O8+PO8+L8+L14+<br>Ln8+V9+PO11+O1<br>1+V13=2O+2V+P<br>O+2L+Ln                                              | O11+V13      | I_13C_6<br>3 | 27.275 | 27.242  | 77.957 |
| L14+V9+Ln8+PO11                                                                                |                                                                                                           | I_13C_6<br>4 | 27.242       | 27.226 | 20.192  |        |

|                          |                      |              |        |        |        |
|--------------------------|----------------------|--------------|--------|--------|--------|
|                          | L8                   | I_13C_6<br>5 | 27.226 | 27.214 | 14.576 |
|                          | O8                   | I_13C_6<br>6 | 27.214 | 27.176 | 75.479 |
|                          | SQ4                  | I_13C_6<br>7 | 26.819 | 26.794 | 1.161  |
|                          | SQ8                  | I_13C_6<br>8 | 26.7   | 26.672 | 1.502  |
|                          | SQ1                  | I_13C_6<br>9 | 25.708 | 25.688 | 1.055  |
|                          | L11                  | I_13C_7<br>0 | 25.672 | 25.651 | 12.208 |
|                          | Ln11                 | I_13C_7<br>1 | 25.651 | 25.637 | 1.655  |
|                          | Ln14                 | I_13C_7<br>2 | 25.567 | 25.548 | 0.594  |
| (O+L+P+S+E+PO+Ln)3       | O3i+P3i+S3i          | I_13C_7<br>3 | 24.938 | 24.907 | 28.433 |
|                          | Li3+Lni3+Pe3+Se3+Vi3 | I_13C_7<br>4 | 24.907 | 24.889 | 29.767 |
|                          | Oe3+Le3+Ve3+Lne3+PO3 | I_13C_7<br>5 | 24.889 | 24.855 | 50.392 |
| O17+E19+L17+P15+S17+Ln17 | P15+S17              | I_13C_7<br>6 | 22.737 | 22.722 | 21.361 |
|                          | O17                  | I_13C_7<br>7 | 22.722 | 22.699 | 60.480 |
|                          | V17                  | I_13C_7<br>8 | 22.699 | 22.685 | 5.293  |
|                          | L17                  | I_13C_7<br>9 | 22.625 | 22.595 | 10.927 |
|                          | PO15                 | I_13C_8<br>0 | 22.58  | 22.558 | 1.295  |
|                          | Ln17                 | I_13C_8<br>1 | 20.601 | 20.545 | 0.987  |
|                          | SQ13                 | I_13C_8<br>2 | 17.701 | 17.644 | 1.382  |
|                          | SQ14                 | I_13C_8<br>3 | 16.063 | 16.024 | 0.973  |
|                          | SQ15                 | I_13C_8<br>4 | 16.024 | 15.984 | 1.238  |
| O18+P16+S18+E20+L18+PO16 | Ln18                 | I_13C_8<br>5 | 14.306 | 14.274 | 1.277  |
|                          | unk                  | I_13C_8<br>6 | 14.274 | 14.24  | 0.741  |
|                          | O18+V18+P16+S18      | I_13C_8<br>7 | 14.162 | 14.102 | 84.676 |
|                          | L18+PO16             | I_13C_8<br>8 | 14.102 | 14.072 | 12.078 |
|                          | UNK                  | I_13C_8<br>9 | 13.997 | 13.964 | 0.426  |

|   |                                                     |              |       |       |          |
|---|-----------------------------------------------------|--------------|-------|-------|----------|
|   | TMS                                                 | I_13C_9<br>0 | 0.032 | -0.03 | 1.695    |
| 0 | Summ Block C-1                                      |              |       |       | 52.027   |
| 0 | Summ aromatic<br>C10=2Ln+2L+O+PO+<br>V              |              |       |       | 104.844  |
| 0 | Summ aromatic<br>C9=2Ln+2L+O+PO+V                   |              |       |       | 97.222   |
| 0 | Summ a-CH2                                          |              |       |       | 100.470  |
| 0 | Summ CH2-omega3                                     |              |       |       | 106.309  |
|   | CH2- block I                                        |              |       |       | 240.526  |
|   | CH2- block II                                       |              |       |       | 190.818  |
|   | CH2- block III                                      |              |       |       | 222.144  |
|   | CH2- block IV                                       |              |       |       | 302.214  |
|   | Vynil-CH2 tot                                       |              |       |       | 188.204  |
| 0 | Summ b-CH2                                          |              |       |       | 108.592  |
| 0 | Summ omega2-CH2                                     |              |       |       | 100.343  |
| 0 | Summ of terminal<br>Me groups                       |              |       |       | 98.031   |
|   | DPFGSE_equations                                    |              |       |       |          |
|   |                                                     |              |       |       | S_1      |
|   | 5S,4R(TY-EA-<br>DA+HTY-EA-DA)                       |              |       |       | 10.109   |
|   | HTY-EDA-DA<br>(Olacein 3-C-H)                       |              |       |       | 35.780   |
|   | TY-EDA-DA<br>(Oleocanthal 3-C-H)                    |              |       |       | 31.317   |
|   | 5S,4S(TY-EA-<br>DA+HTY-EA-DA)                       |              |       |       | -2.631   |
|   | TY-EDA-DA<br>(Oleocanthal 1-C-H)                    |              |       |       | 16.981   |
|   | HTY-EDA-DA<br>(Olacein 1-C-H)+TY-<br>EA-DA+TY-EA-EN |              |       |       | 14.695   |
|   | HTY-EA-DA+HTY-<br>EA-EN                             |              |       |       | 10.275   |
|   | DPFGSE summ<br>tot_rho                              |              |       |       | 2979.906 |

|                                   |                       |
|-----------------------------------|-----------------------|
|                                   | S_1                   |
| sat_lin_ald_ppm_mo<br>1           | 297.734               |
| Ligstroside<br>aglycone           | TY-EA-CYA<br>77.906   |
| Oleuropein<br>aglycone            | HTY-EA-CYA<br>112.859 |
| 2E-hexenal                        | 50.265                |
| other 2E-alkenals                 | 10.496                |
| optimized                         |                       |
| HTY-EDA-DA<br>(Olacein)           | 300.080               |
| TY-EDA-DA<br>(Oleocanthal)        | 412.101               |
| 5S,4R-TY-EA-DA                    | 0.000                 |
| 5S,4S-TY-EA-DA                    | 0.000                 |
| TY-EA-EN                          | 50.765                |
| 5S,4R-HTY-EA-DA                   | 0.000                 |
| 5S,4S-HTY-EA-DA                   | 0.000                 |
| HTY-EA-EN                         | 0.000                 |
| TY-EA                             | 729.843               |
| HTY-EA                            | 112.859               |
|                                   |                       |
|                                   | TUR_5                 |
| Sample                            | S_1                   |
| ⊙-<br>SIT+avenaster+camp<br>oster | 4500.740              |
| Cyclo-sterols                     | 476.116               |
|                                   | 0.000                 |
| Sample                            | 0.000                 |
| Average FW                        | 870.621               |
| TG%                               | 96.687                |
| 1,2-DG%                           | 1.189                 |
| 1,3-DG%                           | 2.124                 |
| Sqmol%                            | 1.675                 |
| Ln%                               | 0.587                 |
| L%                                | 10.178                |
| O%                                | 63.073                |
| PO%                               | 2.093                 |
| V%                                | 2.813                 |
| P%                                | 19.000                |
| S%                                | 2.256                 |



|                                                            |                 |            |          |        |
|------------------------------------------------------------|-----------------|------------|----------|--------|
|                                                            |                 |            |          | 0.000  |
|                                                            |                 |            |          | 0.000  |
|                                                            |                 |            |          | 0.000  |
|                                                            |                 |            |          | 0.001  |
|                                                            |                 |            |          | 5.183  |
|                                                            |                 |            |          | 26.575 |
|                                                            |                 |            |          | 0.000  |
|                                                            |                 |            |          | 1.574  |
|                                                            |                 |            |          | 0.000  |
|                                                            |                 |            |          | 0.000  |
|                                                            |                 |            |          | 0.000  |
|                                                            |                 |            |          | pp     |
|                                                            |                 |            |          | TUR_5  |
| eq_H_1                                                     | aliphatic-CH2   |            |          | -0.388 |
| eq_H_2                                                     | SQ_terminal     |            |          | 0.741  |
| eq_H_3                                                     | SQ+@CH2         |            |          | -0.880 |
| eq_H_4                                                     | Ln - omega3-uns |            |          | 0.083  |
| eq_H_5                                                     | vynilCH2tot     |            |          | -0.057 |
| eq_H_6                                                     | divynilCH2-dufa |            |          | -0.162 |
| eq_H_7                                                     | divynilCH2-tufa |            |          | -0.005 |
| eq_H_8                                                     | CH=CH           |            |          | 0.709  |
| eq_H_9                                                     | 1,2-DG%         |            |          | 0.011  |
| eq_H_10                                                    | TG+5(1,3-DG)    |            |          | 0.184  |
| eq_H_11                                                    | 2*TG+2(1,2-DG)  |            |          | 0.297  |
|                                                            |                 |            |          |        |
|                                                            |                 |            |          | S_1    |
| satqExt                                                    | S1+P1qExt       | I_13C_1    | eq_13C_1 | -0.075 |
| SQ(Cq)                                                     | SQ(Cq)          | I_13C_4/5  | eq_13C_2 | 0.011  |
| Oint/Oext                                                  | Oint/Oext       | I_13C_9/15 | eq_13C_3 | -0.023 |
| Ln16                                                       |                 |            | eq_13C_4 | 0.029  |
| (Ln16)+L13+Ln9+Oint10+Oext10+POint10+Lext9+POext10+Lint9 = | L13+Ln9         | I_13C_8    | eq_13C_5 | 0.193  |
| L13+L9+POint10+Oint10+Ln9 =                                | Oint10          | I_13C_9    | eq_13C_6 | -0.140 |
| 2Ln+2L+O+PO                                                | Oext10+POint10  | I_13C_10   | eq_13C_7 | 0.029  |
|                                                            | Lext9+POext10   | I_13C_11   | eq_13C_8 | 0.024  |
|                                                            | Lint9           | I_13C_12   | eq_13C_9 | 0.036  |

|                                      |                                                            |                 |               |        |
|--------------------------------------|------------------------------------------------------------|-----------------|---------------|--------|
| V12                                  | V                                                          | I_13C_1<br>3    | eq_13C_<br>10 | -0.255 |
| CH toward the<br>head of fatty ester | V11                                                        | I_13C_1<br>4    | eq_13C_<br>11 | -0.003 |
| O9+PO9+Ln12+Ln<br>13+L10+L12+V11=    | Oext9                                                      | I_13C_1<br>5    | eq_13C_<br>12 | 0.222  |
| O+PO+2Ln+2L+V                        | Oint9+PO9                                                  | I_13C_1<br>6    | eq_13C_<br>13 | -0.223 |
|                                      | Ln%(12,13-CH)                                              | I_13C_1<br>7    | eq_13C_<br>14 | 0.028  |
|                                      | L%(CH)                                                     | I_13C_1<br>8    | eq_13C_<br>15 | 0.394  |
|                                      | Ln%(10,15-CH)                                              | I_13C_1<br>9    | eq_13C_<br>16 | -0.004 |
| SQ(CH)                               | SQ(CH)                                                     | I_13C_1<br>5    | eq_13C_<br>17 | -0.101 |
| SQ(9-5-CH2)                          | SQ(9-5-CH2)                                                | I_13C_1<br>6    | eq_13C_<br>18 | -0.006 |
| Pext2+Sext2+Vext<br>2                | Pext2+Sext2+Vext2/O<br>e2+Le2+Lne2                         | I_13C_3<br>1/32 | eq_13C_<br>19 | -0.251 |
| P14+S16+O16+V1<br>6+L16              | P14+S16                                                    | I_13C_2<br>0    | eq_13C_<br>20 | -0.446 |
|                                      | O16                                                        | I_13C_2<br>1    | eq_13C_<br>21 | 0.314  |
|                                      | V16                                                        | I_13C_2<br>2    | eq_13C_<br>22 | 0.024  |
|                                      | PO14                                                       | I_13C_2<br>3    | eq_13C_<br>23 | -0.468 |
|                                      | L16                                                        | I_13C_2<br>4    | eq_13C_<br>24 | 0.162  |
| PO13+O12+E14+S<br>14+S13+S12+S11+    | PO13%                                                      | I_13C_3<br>8    | eq_13C_<br>25 | -0.426 |
| O7+S10+P12+P11+                      | O12                                                        | I_13C_3<br>9    | eq_13C_<br>26 | 0.938  |
| P10+PO12 =                           | V14+V13                                                    |                 | eq_13C_<br>27 | 0.112  |
| 2O+V+2PO+5S+3P                       | S14+S13+S12+S11+O7<br>+S10+P12+P11+P10+P<br>O12=5S+3P+O+PO | I_13C_4<br>1    | eq_13C_<br>28 | -0.126 |
| Pint7+PO7+P8+P9<br>+S7+S8+S9+Pext7+  | Pint7+PO7+P8+P9+S7<br>+S8+S9= 2P+Pi+3S                     | I_13C_4<br>2    | eq_13C_<br>29 | -0.419 |
| Lint7+Lext7+O14+                     | Pext7+Lint7                                                | I_13C_4<br>3    | eq_13C_<br>30 | 0.159  |
| Sint5+Sext5+Pint5<br>+Pext5 =        | Lext7                                                      | I_13C_4<br>4    | eq_13C_<br>31 | 0.352  |
| P7+P8+P9+S7+S8+                      | O14+Sint5                                                  | I_13C_4<br>6    | eq_13C_<br>32 | 0.088  |
| S9+S5+P5+L7+O14<br>+PO7 =            | Sext5+Pint5                                                | I_13C_4<br>7    | eq_13C_<br>33 | 0.028  |
| 4(S+P)+O+L+PO                        |                                                            |                 |               |        |

|                                                                                                                                                                                                                        |                                                                     |              |               |        |
|------------------------------------------------------------------------------------------------------------------------------------------------------------------------------------------------------------------------|---------------------------------------------------------------------|--------------|---------------|--------|
|                                                                                                                                                                                                                        | Pext5                                                               | I_13C_4<br>8 | eq_13C_<br>34 | -0.145 |
| S15+P13+L15 =<br>S+P+L                                                                                                                                                                                                 | S15                                                                 | I_C_51       | eq_13C_<br>35 | 0.411  |
|                                                                                                                                                                                                                        | P13                                                                 | I_C_52       | eq_13C_<br>36 | -0.066 |
|                                                                                                                                                                                                                        | L15                                                                 | I_C_53       | eq_13C_<br>37 | 0.825  |
| O13+O15+Sint6+E<br>15+P6+E5+E6+Sex<br>t6 = 2O+V+P+S                                                                                                                                                                    | O13+O15+Si5                                                         | I_13C_5<br>4 | eq_13C_<br>38 | -0.187 |
|                                                                                                                                                                                                                        | P6+V15+Se5                                                          | I_13C_5<br>5 | eq_13C_<br>39 | 0.162  |
| Oint5+Oext5+L5+<br>Ln5+POint5+O+(L<br>+Ln+E)int5+(S+P+<br>PO)ext5+Oext4+Pi<br>nt4+Sint4+Eint4+L<br>ext6+Lnext6+POin<br>t6+Oint4+Lext4+P<br>Oext4+Lnext4+PO<br>ext6POint4+Lint4<br>+Lnint4 =<br>3Ln+3L+3O+3PO+<br>E+P+S | Oint5+Li+Lni                                                        | I_13C_5<br>6 | eq_13C_<br>40 | 0.147  |
|                                                                                                                                                                                                                        | Oext5+L5+Ln5+POint<br>5                                             | I_13C_5<br>7 | eq_13C_<br>41 | 0.042  |
|                                                                                                                                                                                                                        | O+(L+Ln+E)int+(S+P+<br>PO)ext                                       | I_13C_5<br>8 | eq_13C_<br>42 | 0.021  |
|                                                                                                                                                                                                                        | Oe4+Pi4+Si4+Ei4+Le6<br>+Lne6+Poi6=<br>(O+L+Ln)ext+(P+S+E<br>+PO)int | I_13C_5<br>9 | eq_13C_<br>43 | 0.623  |
|                                                                                                                                                                                                                        | Oint4+Lext4+POext4<br>+Lnext4+POext6                                | I_13C_6<br>0 | eq_13C_<br>44 | -0.287 |
|                                                                                                                                                                                                                        | POint4+Lint4+Lnint4<br>+Vint4                                       | I_13C_4<br>2 | eq_13C_<br>45 | -0.170 |
| O8+V13+L14+V10<br>+Ln8+PO11+L8+P<br>O8+O11=2O+2E+2<br>PO+2L+Ln                                                                                                                                                         | O11+V13                                                             | I_13C_6<br>3 | eq_13C_<br>46 | -0.114 |
|                                                                                                                                                                                                                        | L14+V10+Ln8+Po11                                                    | I_13C_6<br>4 | eq_13C_<br>47 | 0.148  |
|                                                                                                                                                                                                                        | L8                                                                  | I_13C_6<br>5 | eq_13C_<br>48 | 1.258  |
|                                                                                                                                                                                                                        | O8                                                                  | I_13C_6<br>6 | eq_13C_<br>49 | -0.009 |
| SQ(4-8-12-CH2)                                                                                                                                                                                                         | SQ(4-8-12-CH2)                                                      | I_13C_4<br>8 | eq_13C_<br>50 | 0.020  |
| L11%                                                                                                                                                                                                                   | L11%                                                                | I_13C_7<br>0 | eq_13C_<br>51 | 0.319  |
| Ln11%                                                                                                                                                                                                                  | Ln11%                                                               | I_13C_7<br>1 | eq_13C_<br>52 | 0.187  |
| Ln%                                                                                                                                                                                                                    | Ln14%                                                               | I_13C_7<br>2 | eq_13C_<br>53 | -0.008 |
| (O+P+S+E)int3+[(<br>L+Ln)int+(P+S)ext<br>]3+(O+L+E+Ln)ext<br>3+PO3 =<br>(Ln+L+O+PO+E+P<br>+S) second<br>methylene C<br>atom                                                                                            | O3i+P3i+S3i<br>=(O+P+S)int3                                         | I_13C_5<br>1 | eq_13C_<br>54 | -0.196 |
|                                                                                                                                                                                                                        | Li3+Lni3+Pe3+Se3+Vi<br>3=[(L+Ln)int+(P+S)ex<br>t]3                  | I_13C_5<br>2 | eq_13C_<br>55 | -0.301 |
|                                                                                                                                                                                                                        | Oe3+Le3+Ve3+Lne3+<br>PO3=(O+L+E+Ln)e+P<br>O                         | I_13C_5<br>3 | eq_13C_<br>56 | 0.497  |

|                                              |                   |              |               |                                                |
|----------------------------------------------|-------------------|--------------|---------------|------------------------------------------------|
| (Ln+O+P+S+V+L+PO) last methylene carbon atom | P15+S17           | I_13C_5<br>4 | eq_13C_<br>57 | 0.064                                          |
|                                              | O17               | I_13C_5<br>5 | eq_13C_<br>58 | -0.840                                         |
|                                              | V17               | I_13C_5<br>6 | eq_13C_<br>59 | 0.985                                          |
|                                              | L17%              | I_13C_5<br>7 | eq_13C_<br>60 | 0.569                                          |
|                                              | PO15              | I_13C_5<br>8 | eq_13C_<br>61 | -0.401                                         |
|                                              | Ln17              | I_13C_5<br>9 | eq_13C_<br>62 | 0.032                                          |
| SQ(Me-1,13,14,15)                            | SQ(Me-1,13,14,15) | I_13C_6<br>0 | eq_13C_<br>63 | 0.021                                          |
| (Ln+O+P+S+E+L+PO) last carbon atom           | Ln18%             | I_13C_6<br>1 | eq_13C_<br>64 | 0.715                                          |
|                                              | Me(O+P+S+V)       | I_13C_6<br>2 | eq_13C_<br>65 | -0.765                                         |
|                                              | Me(L+PO)          | I_13C_6<br>3 | eq_13C_<br>66 | 0.050                                          |
|                                              |                   |              |               | TUR_5                                          |
|                                              |                   |              |               | S_1                                            |
|                                              |                   |              |               | σ(dev) <sup>2</sup> =rho                       |
|                                              |                   |              |               | Type ctrl+V to run minimization on the raw 387 |
|                                              |                   |              |               | Constrain DG+TG                                |
|                                              |                   |              |               | 100.000                                        |
|                                              |                   |              |               | Constrain total fatty acids                    |
|                                              |                   |              |               | 100.000                                        |
|                                              |                   |              |               | Costrain internal position                     |
|                                              |                   |              |               | 33.333                                         |

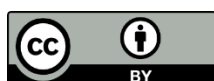

Supplement: foods-09-00384-s001.pdf [file foods-09-00384-s001.pdf]
